# Supplementary material for: Stable Isotopes Reveal Trophic Partitioning and Trophic Plasticity of a Larval Amphibian Guild
Source: PLoS One. 2015 Jun 19;10(6):e0130897. doi: 10.1371/journal.pone.0130897 (PMC4474902; doi:10.1371/journal.pone.0130897)
Supplement: S10 Table — For both sources and amphibians we show the Delta 13C x 1000 (corrected for the amphibians following the equation from Caut et al. 2013), elemmental composition of carbon (Mass Fraction Cx100 or MASSC100), Delta 15N x 1000, and elemmental composition of nitrogen (Mass Fraction Nx100, or MASSN15). For the sources (first tab), we also show the division of Mass Fraction C and Mass Fraction N (C/N), the discrimation factor for δ 13C (following the equation in Caut et al 2013; Δ 13C = -0.35* δ 13C -7.7) and the discrimation factor for δ 15N (following the equation in Caut et al 2013; Δ 15N = 0.53* δ 15N -0.37) of tadpoles for the various resources available. We also show the enriched13C and δ 15N, after taking into account the discrimation factors for each resource. For the amphibians, we show the treatment for each sampled individual (more details in the text), the type (met if metamorphic, and tad if tadpole), the date (in the year 2011) and the weight in grames. Each tab includes the data for each amphibian species included in the experiment (Hyla meridionalis, Pelobates cultripes, Pelophylax perezi, Triturus pygmaeus). (XLSX) [file pone.0130897.s010.xlsx]

## Sheet: SourcesTEF-Raw
Source	Delta 13C x 1000	Mass Fraction C x 100	Delta 15N x 1000	Mass Fraction N x 100	C/N	DiscrFactorC	DiscrFactorN	13C-ENRICHED	15N-ENRICHED
Detritus-Carb	-26.29	5.49	3.71	0.513	10.7018	1.5015		-24.7885
Detritus-Carb	-26.83	5.894	1.77	0.573	10.2862	1.6905		-25.1395
Detritus-Carb	-26.83	5.203	0.75	0.534	9.74345	1.6905		-25.1395
Detritus-Carb	-26.77	5.53	1.01	0.546	10.1282	1.6695		-25.1005
Detritus-Carb	-26.1	6.234	0.85	0.621	10.0386	1.435		-24.665
Detritus-Carb	-26.8	5.652	1.04	0.578	9.77855	1.68		-25.12
Detritus-Nitro	-26.15	6.251	3	0.587	10.6491		1.22	-26.15	4.22
Detritus-Nitro	-26.66	5.512	2.92	0.564	9.77305		1.1776	-26.66	4.0976
Detritus-Nitro	-26.62	4.914	1.31	0.522	9.41379		0.3243	-26.62	1.6343
Detritus-Nitro	-26.57	4.873	2.37	0.494	9.86437		0.8861	-26.57	3.2561
Detritus-Nitro	-25.85	5.965	1.97	0.605	9.8595		0.6741	-25.85	2.6441
Detritus-Nitro	-26.65	5.967	2.96	0.578	10.3235		1.1988	-26.65	4.1588
Algae	-16.74	5.726		0.34	16.8412	-1.841		-18.581	0
Algae	-16.93	7.235	4.35	0.516	14.0213	-1.7745	1.9355	-18.7045	6.2855
Algae	-20.47	8.581	4.87	0.614	13.9756	-0.5355	2.2111	-21.0055	7.0811
Algae	-20.69	6.228		0.33	18.8727	-0.4585		-21.1485	0
Algae	-26.9	10.22	3.39	0.529	19.3195	1.715	1.4267	-25.185	4.8167
Algae	-27.35	9.383		0.303	30.967	1.8725		-25.4775	0
Zooplankton	-25.84	10.34	5.57	0.996	10.3815	1.344	2.5821	-24.496	8.1521
Zooplankton	-25.91	33.11	4.01	2.456	13.4813	1.3685	1.7553	-24.5415	5.7653
Zooplankton	-26.53	16.38		0.744	22.0161	1.5855		-24.9445	0
Zooplankton	-22.31	40.69	1.68	4.713	8.63357	0.1085	0.5204	-22.2015	2.2004
Zooplankton	-24.62	22.54	6.55	1.999	11.2756	0.917	3.1015	-23.703	9.6515
Zooplankton	-24.92	16.5	6.51	1.533	10.7632	1.022	3.0803	-23.898	9.5903
Charophytes	-18.32	20.96	9.34	0.877	23.8997	-1.288	4.5802	-19.608	13.9202
Ranunculus	-20.09	40.19	9.94	2.151	18.6843	-0.6685	4.8982	-20.7585	14.8382
Myriophyllum	-20.18	44.33	9.88	2.908	15.2442	-0.637	4.8664	-20.817	14.7464
Charophytes	-18.76	20.14	7.76	0.949	21.2223	-1.134	3.7428	-19.894	11.5028
Callitriche	-30.46	44.44	10.03	2.255	19.7073	2.961	4.9459	-27.499	14.9759
Myriophyllum	-19.66	43.48	10.92	3.722	11.6819	-0.819	5.4176	-20.479	16.3376
Ranunculus	-21.88	41.14	11.37	1.861	22.1064	-0.042	5.6561	-21.922	17.0261
Charophytes	-18.25	19.14	6.56	0.904	21.1726	-1.3125	3.1068	-19.5625	9.6668
Ranunculus	-17.95	42.43	11.14	2.025	20.9531	-1.4175	5.5342	-19.3675	16.6742
Myriophyllum	-18.96	44.27	10.77	3.134	14.1257	-1.064	5.3381	-20.024	16.1081
Callitriche	-30.14	47.53	9.02	2.392	19.8704	2.849	4.4106	-27.291	13.4306
Charophytes	-19.24	19.45	8.38	0.794	24.4962	-0.966	4.0714	-20.206	12.4514
Myriophyllum	-20.59	45.26	9.45	3.464	13.0658	-0.4935	4.6385	-21.0835	14.0885
Callitriche	-29.2	47.78	7.85	2.663	17.9422	2.52	3.7905	-26.68	11.6405
Ranunculus	-17.9	41.63	12.34	2.372	17.5506	-1.435	6.1702	-19.335	18.5102
Charophytes	-16.8	20.77	7.11	0.863	24.0672	-1.82	3.3983	-18.62	10.5083
Ranunculus	-16.4	41.52	10.32	3.008	13.8032	-1.96	5.0996	-18.36	15.4196
Myriophyllum	-17.8	45.19	9.87	3.601	12.5493	-1.47	4.8611	-19.27	14.7311
Callitriche	-29.24	43.16	7.92	2.238	19.2851	2.534	3.8276	-26.706	11.7476
Ranunculus	-19.62	41.06	10.82	2.153	19.0711	-0.833	5.3646	-20.453	16.1846
Myriophyllum	-20.27		9.08			-0.6055	4.4424	-20.8755	13.5224
Charophytes	-18.96	23.1	9.34	1.087	21.2511	-1.064	4.5802	-20.024	13.9202
Callitriche	-29.07	45.78	6.95	2.593	17.6552	2.4745	3.3135	-26.5955	10.2635

## Sheet: Hyla-Raw
TANK	SampleID	Treatment	D13C-corrected	MASSC100	D15N	MASSN15	Type	Date	Weight (g)
3	138	NOPC	-22.0619	43.01	9.03	12.75	HYLAmet	2018-05-07	0.2229
4	131	INVFREE	-22.1833	45.79	9.45	12.77	HYLAmet	2018-05-18	0.4457
5	43	LOW	-22.4197	39.8	6.51	11.24	HYLAmet	2018-05-12	0.1232
6	133	NOPC	-19.9384	43.88	7.62	12.57	HYLAmet	2018-05-18	0.2788
7	127	NATCAG	-21.7289	44.69	8.61	12.33	HYLAmet	2018-05-27	0.1617
9	46	INVFREE	-23.3943	46.76	6.22	13.15	HYLAmet	2018-05-01	0.1554
10	47	NATCAG	-22.5795	41.37	7.3	11.77	HYLAmet	2018-05-17	0.0881
12	368	HIGH	-25.2223	48.27	8.07	14.2	HYLAtad	2018-06-04	0.5995
13	48	NOPC	-19.4896	40.02	4.23	11.3	HYLAmet	2018-05-01	0.3429
14	49	NATFREE	-22.3472	38.04	4.81	10.64	HYLAmet	2018-05-01	0.1893
15	128	NATFREE	-22.5041	44.92	6.73	12.63	HYLAmet	2018-05-17	0.1869
16	137	NATCAG	-20.1149	43.84	8.38	13.24	HYLAmet	2018-05-17	0.1111
20	54	NATFREE	-21.2074	39.93	7.22	11.43	HYLAmet	2018-05-17	0.1555
20	140	NATFREE	-20.2733	45.86	8.12	13.72	HYLAmet	2018-05-28	0.2097
24	120	NATCAG	-23.5015	43.32	7.67	12.44	HYLAmet	2018-05-20	0.1656
22	122	NATFREE	-20.8554	41.2	8.5	11.96	HYLAmet	2018-05-25	0.2316
24	57	NATCAG	-23.2537	38.68	6.91	11.04	HYLAmet	2018-05-14	0.127
26	139	INVCAG	-20.9857	38.18	8.63	11.73	HYLAmet	2018-05-12	0.1349
27	135	HIGH	-22.0939	44.25	9.49	12.73	HYLAmet	2018-06-04	0.2904
28	136	INVCAG	-22.7915	46.36	6.83	13.63	HYLAmet	2018-05-24	0.1107
29	130	INVFREE	-23.9365	41.64	8.08	11.82	HYLAmet	2018-05-05	0.0816
30	218	HIGH	-25.4513	50.08	7.83	15.33	HYLAtad	2018-06-03	0.2443
33	126	LOW	-21.9365	41.83	7.9	12.17	HYLAmet	2018-05-04	0.1414
35	141	NATCAG	-22.1858	46.2	8.57	13.85	HYLAmet	2018-05-12	0.201
39	227	HIGH	-26.6735	48.55	8.05	15.4	HYLAtad	2018-06-05	0.2922
40	132	NATFREE	-20.8567	41.91	8.72	11.99	HYLAmet	2018-05-17	0.1996
41	129	NOPC	-19.3995	45.77	9.16	12.54	HYLAmet	2018-05-17	0.2545
42	72	NATCAG	-21.2545	37.68	8.59	11.86	HYLAmet	2018-05-13	0.1384
43	125	LOW	-21.5151	40.13	8.73	11.4	HYLAmet	2018-05-03	0.1061
44	74	NATCAG	-24.0016	44.6	7.87	14.37	HYLAmet	2018-05-01	0.1134
47	123	NATCAG	-22.3885	43.42	9.79	12.25	HYLAmet	2018-05-21	0.1115
48	121	LOW	-23.0197	39.66	7.36	11.33	HYLAmet	2018-05-07	0.108
49	78	INVFREE	-22.3514	47.94	8.83	15.05	HYLAmet	2018-05-24	0.3425
52	142	NOPC	-22.4354	42.69	8.55	12.59	HYLAmet	2018-05-07	0.205
54	81	NATFREE	-21.2533	41.25	7.67	11.68	HYLAmet	2018-05-12	0.1847
55	143	NOPC	-21.3782	42.18	7.71	12.67	HYLAmet	2018-05-09	0.166
58	144	INVCAG	-22.6547	41.6	7.28	12.36	HYLAmet	2018-05-12	0.1138
59	145	NOPC	-21.2501	40.86	8.75	11.72	HYLAmet	2018-05-14	0.2772
61	146	NOPC	-20.9013	41.66	10.35	12.15	HYLAmet	2018-05-05	0.114
62	89	LOW	-22.4314	42.76	7.61	12.13	HYLAmet	2018-05-13	0.1416
65	91	INVFREE	-23.4274	45.03	6.78	13.97	HYLAmet	2018-05-07	0.1837
66	147	INVCAG	-22.0693	38.7	7.78	11.73	HYLAmet	2018-05-18	0.1879
67	148	INVFREE	-24.9526	43.06	9.69	12.28	HYLAmet	2018-05-17	0.1802
68	95	NOPC	-23.9375	46.39	7.56	13.28	HYLAmet	2018-05-03	0.1852
71	149	NATCAG	-21.585	41.45	7.44	12.22	HYLAmet	2018-05-09	0.2065
72	150	NATFREE	-22.4203	44.44	7.65	12.95	HYLAmet	2018-05-14	0.186
73	100	LOW	-22.6222	43.34	5.69	12.49	HYLAmet	2018-05-01	0.1676
73	151	LOW	-22.5744	42.15	8.76	12.11	HYLAmet	2018-05-26	0.1884
74	152	INVCAG	-21.3277	42.42	7.82	12.24	HYLAmet	2018-05-19	0.2151
76	153	INVCAG	-23.1454	38.21	8.83	12.46	HYLAmet	2018-05-17	0.226
77	104	INVCAG	-22.212	42.05	9.13	12.08	HYLAmet	2018-05-03	0.1327
77	154	INVCAG	-22.3422	38.68	8.63	12.69	HYLAmet	2018-05-19	0.1203
78	155	NATCAG	-20.1213	43.5	6.27	13.89	HYLAmet	2018-05-28	0.3176
80	156	LOW	-24.1409	35.48	8.9	11.42	HYLAmet	2018-05-11	0.0984
81	157	INVCAG	-22.997	39.14	7.54	12.56	HYLAmet	2018-05-17	0.2514
83	158	INVCAG	-21.6509	38.97	6.75	12.44	HYLAmet	2018-05-08	0.1365
84	111	INVFREE	-24.935	44.83	6.5	12.71	HYLAmet	2018-05-05	0.1248
85	112	LOW	-20.9286	42.96	6.05	11.99	HYLAmet	2018-05-01	0.1218
86	253	HIGH	-23.5105	45.39	7.87	13.66	HYLAtad	2018-06-05	0.319
87	159	NOPC	-22.4606	37.23	7.46	11.78	HYLAmet	2018-05-08	0.1475
89	160	INVCAG	-23.4548	38.69	9.29	12.5	HYLAmet	2018-05-20	0.112
91	161	NATCAG	-21.5324	31.86	10.18	10.74	HYLAmet	2018-05-27	0.1395
92	116	NOPC	-24.4451	43.8	10.1	12.14	HYLAmet	2018-05-05	0.1672
94	118	NATFREE	-20.9634	41.47	7.95	11.48	HYLAmet	2018-05-09	0.1491
95	357	HIGH	-23.7417	48.86	9.17	13.61	HYLAtad	2018-06-05	0.4036
96	162	LOW	-22.4918	41.97	9.12	12	HYLAmet	2018-05-27	0.1336

## Sheet: Pelobates-Raw
TANK	SampleID	Treatment	D13C-corrected	MASSC100	D15N	MASSN15	Type	Date	Weight (g)
23	339	HIGH	-23.9897	48.41	7.4	13.67	PELOtad	2018-06-03	2.8753
27	403	HIGH	-22.4778	46.51	9.95	14.08	PELOtad	2018-06-03	9.0576
30	216	HIGH	-22.6494	50.65	8.92	15.48	PELOtad	2018-06-03	7.2144
69	282	HIGH	-23.2549	49.41	8.62	15.17	PELOtad	2018-06-03	4.8852
36	408	HIGH	-23.7753	47.65	9.92	13.94	PELOtad	2018-06-04	7.004
21	342	HIGH	-23.3148	47.77	9.88	13.86	PELOtad	2018-06-05	4.3612
39	225	HIGH	-24.2673	48.49	9.4	15.98	PELOtad	2018-06-05	4.013
86	250	HIGH	-23.4383	48.6	9.18	14.14	PELOtad	2018-06-05	3.6447
95	354	HIGH	-23.0223	48.08	9.94	13.2	PELOtad	2018-06-05	5.455
28	234	INVCAG	-21.8175	49.02	7.65	13.41	PELOtad	2018-06-03	5.355
46	259	INVCAG	-20.3074	49.07	10.36	14.38	PELOtad	2018-06-03	11.6722
74	360	INVCAG	-21.3154	45.78	8	13.72	PELOtad	2018-06-03	17.7614
77	361	INVCAG	-19.7418	47.05	10.54	13.62	PELOtad	2018-06-04	12.5509
89	220	INVCAG	-20.9001	47.62	10.89	15.06	PELOtad	2018-06-05	12.0729
63	296	INVFREE	-23.3299	46.31	6.5	13.18	PELOtad	2018-06-05	8.5816
93	233	INVFREE	-21.8437	48.25	9.81	13.26	PELOtad	2018-06-05	4.0296
5	335	LOW	-21.5784	46.93	8.37	12.66	PELOtad	2018-06-03	12.9875
31	241	LOW	-22.8075	48.82	11.42	12.61	PELOtad	2018-06-03	11.2628
73	298	LOW	-20.608	47.4	9.23	13.47	PELOtad	2018-06-03	10.3683
80	382	LOW	-22.3301	45.5	10.54	13.8	PELOtad	2018-06-04	13.1524
62	346	LOW	-19.6005	47.48	9.17	13.73	PELOtad	2018-06-05	9.9681
85	239	LOW	-20.5758	47.91	8.91	12.19	PELOtad	2018-06-05	9.1197
96	291	LOW	-20.9613	47.07	10.97	13.41	PELOtad	2018-06-06	10.1285
24	285	NATCAG	-24.2631	46.16	9.69	12.68	PELOtad	2018-06-03	8.8973
47	270	NATCAG	-21.7488	48.58	11.06	14.14	PELOtad	2018-06-03	12.4344
10	331	NATCAG	-22.0273	47.33	9.21	13.24	PELOtad	2018-06-04	11.3789
18	274	NATCAG	-21.6691	48.92	9.34	14.47	PELOtad	2018-06-05	14.723
45	268	NATFREE	-24.781	47.05	9.33	14.05	PELOtad	2018-06-03	7.676
70	301	NATFREE	-21.2273	48.05	8.85	14.08	PELOtad	2018-06-03	7.9251
34	364	NATFREE	-20.0378	46.03	8.49	13.71	PELOtad	2018-06-04	14.1507
94	292	NATFREE	-19.2395	46	8.85	12.24	PELOtad	2018-06-05	11.5
95	316	HIGH	-22.7415	48.22	9.9	13.74	PELOmet	2018-05-07	1.8091
30	304	HIGH	-22.0198	47.68	10.52	14.34	PELOmet	2018-05-12	1.801
27	305	HIGH	-22.5574	47.24	9.64	14.18	PELOmet	2018-05-18	na
36	315	HIGH	-22.6714	48.42	9.52	13.69	PELOmet	2018-05-12	1.7646
32	321	HIGH	-23.2279	47.72	9.83	13.56	PELOmet	2018-05-12	1.6915
23	320	HIGH	-25.2153	48.31	8.69	13.7	PELOmet	2018-05-16	1.4703
69	310	HIGH	-23.2907	47.82	10.78	14.05	PELOmet	2018-05-17	1.461
86	281	HIGH	-23.9036	49.56	9.63	14.48	PELOmet	2018-05-19	1.9536
12	196	HIGH	-22.818	47.82	10.42	14.72	PELOtad	2018-06-06	5.781
76	254	INVCAG	-23.9668	49.36	10.46	14.69	PELOmet	2018-05-13	3.693
74	311	INVCAG	-20.8497	49.6	12.23	13.9	PELOmet	2018-05-18	na
83	214	INVCAG	-20.1397	50.56	8.52	15.33	PELOmet	2018-05-24	3.8401
81	314	INVCAG	-21.4954	48.41	8.82	13.73	PELOmet	2018-05-25	4.7064
66	201	INVCAG	-20.3037	49.71	9.62	14.64	PELOmet	2018-05-26	2.4463
46	187	INVCAG	-23.4608	38.12	10.43	9.938	PELOmet	2018-05-27	2.0684
28	197	INVCAG	-21.4286	49.11	8.63	14.07	PELOmet	2018-05-27	3.2672
58	213	INVCAG	-20.588	47.26	11.88	14.31	PELOmet	2018-06-01	2.7045
77	7	INVCAG	-21.993	47.41	10.94	13.12	PELOmet	2018-06-03	2.9429
89	203	INVCAG	-21.6386	48.79	12.38	14.78	PELOmet	2018-06-04	2.4063
19	186	INVCAG	-21.7946	48.25	9.78	13.47	PELOmet	2018-06-06	2.4432
4	317	INVFREE	-21.2265	49.51	11.75	12.96	PELOmet	2018-05-16	3.3569
93	312	INVFREE	-22.5476	50.35	12.56	13.19	PELOmet	2018-05-19	3.6485
63	319	INVFREE	-23.1744	48.89	7.67	13.15	PELOmet	2018-05-19	3.7914
84	313	INVFREE	-25.5333	48.76	9.02	13.01	PELOmet	2018-05-23	2.4824
84	177	INVFREE	-21.0647	44.63	9.74	13.7	PELOmet	2018-06-04	8.8247
33	308	LOW	-21.1031	48.51	11.27	14.28	PELOmet	2018-05-20	2.4276
2	194	LOW	-22.6862	47.16	10.34	14.74	PELOmet	2018-05-25	3.2655
5	191	LOW	-22.5279	47.3	9.66	14.09	PELOmet	2018-05-26	2.1963
62	188	LOW	-21.6703	46.37	9.72	13.84	PELOmet	2018-05-31	3.609
31	202	LOW	-21.0409	48.4	10.04	14	PELOmet	2018-06-02	4.9855
48	237	LOW	-22.2567	50.07	10.48	12.49	PELOmet	2018-06-02	3.1795
96	238	LOW	-21.2092	49.09	11.58	13.06	PELOmet	2018-06-04	2.9667
43	185	LOW	-20.4411	49.58	10.7	13.6	PELOmet	2018-06-06	3.9607
80	190	LOW	-22.8787	34.87	11.06	10.74	PELOmet	2018-06-06	3.7982
16	210	NATCAG	-22.9195	47.66	9.57	13.99	PELOmet	2018-05-24	2.5301
7	195	NATCAG	-21.0146	46	10.57	14.48	PELOmet	2018-05-26	2.731
35	205	NATCAG	-20.9112	46.39	10.99	14.2	PELOmet	2018-05-26	4.328
78	199	NATCAG	-20.754	50.51	10.7	14.42	PELOmet	2018-05-27	4.1418
47	198	NATCAG	-22.2333	49.3	10.55	14.4	PELOmet	2018-05-29	2.151
24	200	NATCAG	-21.9306	48.93	9.58	14.15	PELOmet	2018-05-31	3.3144
18	211	NATCAG	-22.7047	49.5	10.27	14.59	PELOmet	2018-06-01	2.8407
35	3	NATCAG	-19.1254	45.56	10.39	13.33	PELOmet	2018-06-03	4.113
91	249	NATCAG	-21.5552	46.39	12.01	13.36	PELOmet	2018-06-04	4.5098
44	189	NATCAG	-21.5116	45.22	10.89	14.32	PELOmet	2018-06-06	2.628
40	399	NATFREE	-22.4806	46.71	10.72	14.29	PELOmet	2018-05-12	3.6559
51	309	NATFREE	-22.1212	48.04	10.47	13.9	PELOmet	2018-05-19	3.2935
20	318	NATFREE	-21.5877	50.21	9.33	13.44	PELOmet	2018-05-19	3.6767
72	303	NATFREE	-20.922	47.68	8.81	14.25	PELOmet	2018-05-23	3.7294
70	206	NATFREE	-20.3147	45.84	11.28	14.19	PELOmet	2018-05-26	4.1168
15	212	NATFREE	-21.2512	45.97	9.79	13.62	PELOmet	2018-05-26	1.6326
15	215	NATFREE	-21.9038	50.53	8.61	15.63	PELOmet	2018-05-30	3.612
51	307	NATFREE	-21.8119	42.43	9.66	11.31	PELOmet	2018-06-02	4.8598
54	208	NATFREE	-21.2151	47.38	10.56	13.97	PELOmet	2018-06-03	4.2695
22	240	NATFREE	-20.3415	50.67	11.62	12.68	PELOmet	2018-06-04	4.5263
15	247	NATFREE	-20.9209	49.44	10.31	12.8	PELOmet	2018-06-04	5.5229
14	184	NATFREE	-20.0831	47.01	9.27	13.95	PELOmet	2018-06-06	4.2867

## Sheet: Pelophylax-Raw
TANK	SampleID	Treatment	D13C-corrected	MASSC100	D15N	MASSN15	Type	Date	Weight (g)
2	280	LOW	-21.6604	49.61	8.67	15.05	RANAtad	2018-06-03	0.6521
3	173	NOPC	-21.0213	44.06	4.91	13.6	RANAtad	2018-06-03	2.5658
5	337	LOW	-23.5337	47.91	6.56	14.11	RANAtad	2018-06-03	1.2296
6	176	NOPC	-19.984	46.45	3.52	14.37	RANAtad	2018-06-03	1.009
9	258	INVFREE	-20.2779	47.72	9.78	13.88	RANAtad	2018-06-04	0.4256
10	334	NATCAG	-28.6788	48.82	6.34	14.21	RANAtad	2018-06-04	0.5921
12	27	HIGH	-27.2543	43.95	6.91	13.16	RANAmet	2018-06-04	0.3693
12	370	HIGH	-24.7364	47.61	8.55	14.28	RANAtad	2018-06-04	0.5415
13	256	NOPC	-17.2634	46.63	2.08	13.84	RANAtad	2018-06-05	1.8362
14	232	NATFREE	-20.8018	49.09	7.82	14.1	RANAtad	2018-06-04	1.9142
14	9	NATFREE	-22.9433	45.64	7.24	14.23	RANAmet	2018-06-04	0.7725
15	180	NATFREE	-23.8844	44.98	7.91	13.92	RANAtad	2018-06-05	1.4822
18	275	NATCAG	-24.757	47.67	7.48	14.19	RANAtad	2018-06-05	0.283
19	169	INVCAG	-22.9964	45.77	6.9	13.84	RANAtad	2018-06-05	0.8405
20	353	NATFREE	-20.9049	48	9.37	13.01	RANAtad	2018-06-05	0.2062
21	343	HIGH	-31.0583	48.69	5.81	13.63	RANAtad	2018-06-05	0.1818
23	340	HIGH	-24.9042	48.93	5.67	14.08	RANAtad	2018-06-03	0.6522
24	286	NATCAG	-27.7847	46.63	7.34	13.32	RANAtad	2018-06-03	0.9286
26	28	INVCAG	-25.4634	44.64	7.71	13.25	RANAmet	2018-06-03	0.7951
27	405	HIGH	-31.1973	45.24	6.34	13.05	RANAtad	2018-06-03	0.4841
57	418	INVFREE	-22.4479	45.68	9.83	14.06	RANAtad	2018-06-04	0.9258
28	30	INVCAG	-24.5732	45.36	6.18	13.57	RANAmet	2018-06-04	0.4392
28	236	INVCAG	-24.1163	49.02	6.79	12.74	RANAtad	2018-06-03	1.0953
30	219	HIGH	-25.1444	50.66	7.24	15.81	RANAtad	2018-06-03	0.7298
31	243	LOW	-26.2981	50.1	9.3	12.68	RANAtad	2018-06-03	1.139
33	29	LOW	-22.8609	45.48	7.49	13.58	RANAmet	2018-06-04	0.4333
34	365	NATFREE	-20.1522	47.43	5.89	14.41	RANAtad	2018-06-04	1.074
35	31	NATCAG	-22.7059	46.4	6.87	13.37	RANAmet	2018-06-04	0.8205
35	5	NATCAG	-22.65	45.44	7.86	13.45	RANAtad	2018-06-04	0.8447
36	32	HIGH	-25.775	44.89	7.75	13.13	RANAmet	2018-06-04	0.3762
36	409	HIGH	-29.2392	45.03	7.95	13.32	RANAtad	2018-06-04	0.6278
38	421	INVFREE	-19.0641	45.88	9.92	13.41	RANAtad	2018-06-05	0.2943
39	228	HIGH	-25.3946	49.4	7.6	15.55	RANAtad	2018-06-05	0.1134
40	182	NATFREE	-20.0269	45.87	10.83	13.99	RANAtad	2018-06-05	1.4226
41	33	NOPC	-18.308	42.34	3.26	12.22	RANAmet	2018-06-05	0.5939
42	367	NATCAG	-18.3842	47.74	9.62	14.41	RANAtad	2018-06-05	1.2242
44	372	NATCAG	-24.5279	47.96	8.45	14.52	RANAtad	2018-06-04	0.2765
45	269	NATFREE	-27.8578	49.24	6.67	14.55	RANAtad	2018-06-03	0.8023
46	260	INVCAG	-21.9988	41.83	12.07	11.54	RANAtad	2018-06-03	0.6068
47	34	NATCAG	-25.8049	44.25	7.69	12.84	RANAmet	2018-06-04	0.2877
47	273	NATCAG	-27.3843	47.74	7.5	14.18	RANAtad	2018-06-03	0.2584
49	413	INVFREE	-25.7169	46.09	9.13	13.83	RANAtad	2018-06-03	0.5232
51	306	NATFREE	-23.2561	46.63	8.38	13.87	RANAtad	2018-06-03	1.1689
52	376	NOPC	-18.1292	46.73	2.74	14.52	RANAtad	2018-06-03	1.133
55	179	NOPC	-25.6909	44.04	7.47	13.82	RANAtad	2018-06-04	0.5038
56	426	INVFREE	-21.5147	45.6	10.63	13.23	RANAtad	2018-06-04	0.4006
58	165	INVCAG	-26.694	44.51	8.46	13.77	RANAtad	2018-06-04	1.058
59	436	NOPC	-19.5211	46.21	6.66	13.69	RANAtad	2018-06-05	0.4517
62	347	LOW	-22.6349	48.06	7.68	13.73	RANAtad	2018-06-05	0.6238
63	297	INVFREE	-19.1485	46.39	5.39	13.29	RANAtad	2018-06-05	0.4088
65	422	INVFREE	-19.4348	45.78	9.43	13.18	RANAtad	2018-06-05	0.2459
68	35	NOPC	-26.7415	48.4	5.79	14.46	RANAmet	2018-06-03	0.5385
69	284	HIGH	-30.7623	46.03	5.32	13.33	RANAtad	2018-06-03	0.6974
70	36	NATFREE	-20.8492	45.97	6.6	13.28	RANAmet	2018-06-03	0.5944
71	37	NATCAG	-24.8382	45.98	6.69	13.17	RANAmet	2018-06-03	0.3825
72	38	NATFREE	-22.2026	46.04	7.08	13.13	RANAmet	2018-06-03	0.633
73	300	LOW	-23.7325	46.76	6.8	13.65	RANAtad	2018-06-03	0.4268
74	39	INVCAG	-25.1326	43.91	7.14	12.62	RANAmet	2018-06-03	0.6243
74	359	INVCAG	-23.0589	47.88	7.34	14.39	RANAtad	2018-06-03	1.1237
75	168	NOPC	-20.7135	44.95	3.96	13.9	RANAtad	2018-06-04	1.0867
76	171	INVCAG	-24.5547	44.88	7.73	14.01	RANAtad	2018-06-04	0.7891
77	362	INVCAG	-26.0647	47.04	6.81	14.44	RANAtad	2018-06-04	0.8441
80	384	LOW	-29.1908	44.65	6.15	13.44	RANAtad	2018-06-04	0.8905
87	267	NOPC	-24.2893	49.04	2.22	13.95	RANAtad	2018-06-05	1.1881
89	223	INVCAG	-22.1555	47.38	8.88	14.8	RANAtad	2018-06-05	0.3959
91	264	NATCAG	-22.8673	47.76	8.71	14.22	RANAtad	2018-06-03	0.6992
92	351	NOPC	-17.6799	48.28	5.98	13.43	RANAtad	2018-06-05	0.863
95	356	HIGH	-31.1963	49.24	6.32	13.36	RANAtad	2018-06-05	0.6327
96	289	LOW	-22.7211	47.33	10.04	12.7	RANAtad	2018-06-06	0.1002

## Sheet: Triturus-Raw
TANK	SampleID	Treatment	D13C-corrected	MASSC100	D15N	MASSN15	Type	Date	Weight (g)
6	175	NOPC	-21.7243	39.34	10.69	10.98	TRITURUS	2018-06-03	0.9816
13	12	NOPC	-21.0025	42.02	8.52	12.17	TRITURUS	2018-06-05	1.1183
26	13	INVCAG	-22.2078	38.92	8.85	10.65	TRITURUSmet	2018-05-26	0.5265
34	14	NATFREE	-20.6535	41.4	8.75	12	TRITURUSmet	2018-06-04	0.6251
41	15	NOPC	-19.8014	38.71	7.79	11.29	TRITURUSmet	2018-06-01	0.6469
48	16	LOW	-23.1442	43.79	9.18	12.7	TRITURUSmet	2018-05-30	0.5743
75	167	NOPC	-19.352	38.18	8.27	10.8	TRITURUS	2018-06-04	0.741
44	17	NATCAG	-21.2362	39.57	9.91	11.06	TRITURUSmet	2018-06-05	0.734
19	170	INVCAG	-22.6323	37.98	9.94	10.35	TRITURUS	2018-06-05	0.9614
76	172	INVCAG	-21.3822	40.89	11.09	11.84	TRITURUS	2018-06-04	0.9354
3	174	NOPC	-21.7957	38.37	10.36	10.33	TRITURUS	2018-06-03	0.7802
55	18	NOPC	-20.1544	38.92	8.51	11.03	TRITURUS	2018-06-04	0.6568
15	181	NATFREE	-20.8263	39.93	9.79	11.42	TRITURUS	2018-06-05	1.4357
40	183	NATFREE	-22.5272	42.85	11.06	12.17	TRITURUS	2018-06-05	1.0278
59	19	NOPC	-21.3228	40.92	9.05	10.39	TRITURUS	2018-06-05	1.0096
35	2	NATCAG	-22.37	40.04	9.9	10.36	TRITURUS	2018-06-04	0.9829
61	20	NOPC	-20.8002	40.08	8.12	10.67	TRITURUSmet	2018-05-28	0.6918
58	204	INVCAG	-21.8693	42.06	9.6	11.11	TRITURUS	2018-06-07	0.9273
59	21	NOPC	-21.234	31.62	8.63	8.565	TRITURUS	2018-06-05	1.0096
30	217	HIGH	-24.7518	41.85	9.81	12.02	TRITURUS	2018-06-03	0.6835
76	22	INVCAG	-23.0392	42.01	9.4	10.94	TRITURUSmet	2018-05-31	0.5481
89	221	INVCAG	-22.5904	46.2	10.67	14.37	TRITURUS	2018-06-05	1.3212
39	226	HIGH	-26.9201	44.67	9.97	13.66	TRITURUS	2018-06-05	0.785
74	23	INVCAG	-23.5127	43.8	8.91	10.97	TRITURUSmet	2018-05-24	0.6243
14	230	NATFREE	-21.8879	44.65	9.11	13.3	TRITURUS	2018-06-04	1.295
28	235	INVCAG	-23.5323	42.71	9.71	10.08	TRITURUS	2018-06-03	0.844
80	24	LOW	-21.8718	44.59	10.22	11.8	TRITURUSmet	2018-06-01	0.7673
31	242	LOW	-23.5356	39.93	13.4	8.771	TRITURUS	2018-06-03	0.8251
70	25	NATFREE	-21.3989	40.02	9.35	10.8	TRITURUSmet	2018-05-30	0.4705
13	255	NOPC	-20.9006	40.39	9.29	10.17	TRITURUS	2018-06-05	1.1183
46	261	INVCAG	-20.2521	48.7	8.34	14.1	TRITURUS	2018-06-03	0.9354
91	263	NATCAG	-21.7827	46.21	12.01	12.69	TRITURUS	2018-06-03	1.0945
87	266	NOPC	-22.3404	40.38	9.94	10.03	TRITURUS	2018-06-05	0.6689
47	271	NATCAG	-22.2123	41.89	11.15	11.01	TRITURUS	2018-06-03	1.271
18	277	NATCAG	-24.7521	47.69	10.78	12.9	TRITURUS	2018-06-05	0.7032
2	278	LOW	-23.7361	40.65	10.69	10.79	TRITURUS	2018-06-03	0.9657
69	283	HIGH	-24.2136	43.95	10.06	12.74	TRITURUS	2018-06-03	0.4671
24	287	NATCAG	-24.4466	43.97	10.33	11.43	TRITURUS	2018-06-03	1.1028
96	290	LOW	-20.924	44.71	10.7	12.2	TRITURUS	2018-06-06	0.9924
94	293	NATFREE	-20.3818	37.39	9.46	9.824	TRITURUS	2018-06-05	0.959
73	299	LOW	-24.8498	39.73	9.38	9.931	TRITURUS	2018-06-03	0.8311
70	302	NATFREE	-19.7916	40.56	9.27	10.29	TRITURUS	2018-06-03	1.0249
16	324	NATCAG	-24.358	42.95	8.48	10.87	TRITURUS	2018-06-05	1.0631
10	333	NATCAG	-23.2859	45.16	9.95	12.16	TRITURUS	2018-06-04	0.7474
5	336	LOW	-23.1025	44.62	10	11.73	TRITURUS	2018-06-03	0.6271
23	341	NATCAG	-25.7925	39.6	9.29	10.41	TRITURUS	2018-06-03	0.5222
21	344	NATFREE	-24.7927	41.84	11.38	11	TRITURUS	2018-06-05	0.4579
62	348	LOW	-19.9355	38.57	9.71	9.24	TRITURUS	2018-06-05	1.08
92	349	NOPC	-20.9389	41.19	9.87	10.36	TRITURUS	2018-06-05	0.8596
20	352	NATFREE	-22.1038	40.93	10.9	10.19	TRITURUS	2018-06-05	1.2295
95	355	HIGH	-24.4739	42.7	10.86	10.56	TRITURUS	2018-06-05	0.724
74	358	INVCAG	-21.7912	37.95	10.14	8.465	TRITURUS	2018-06-03	1.073
77	363	INVCAG	-22.9467	38.49	9.72	10.37	TRITURUS	2018-06-04	0.9446
42	366	NATCAG	-22.852	39.39	10.61	10.5	TRITURUS	2018-06-05	0.9622
12	371	HIGH	-24.8388	45.42	10.76	12.53	TRITURUS	2018-06-04	0.7697
22	375	HIGH	-22.8044	40.8	10.9	9.581	TRITURUS	2018-06-04	0.971
52	377	NOPC	-22.4182	40.19	8.83	10.84	TRITURUS	2018-06-03	0.6742
27	404	HIGH	-25.159	35.49	10.08	9.241	TRITURUS	2018-06-03	0.4058
7	406	NATCAG	-22.6306	40.23	11.37	10.87	TRITURUS	2018-06-04	0.9169
36	410	HIGH	-26.0124	37.03	11.33	9.028	TRITURUS	2018-06-04	0.918
36	411	HIGH	-25.6749	38.71	10.45	9.33	TRITURUS	2018-06-04	0.7606
26	415	INVCAG	-21.8575	42.32	10.44	11.93	TRITURUS	2018-06-03	0.796
33	420	LOW	-21.4833	38.79	11.33	10.35	TRITURUS	2018-06-04	0.7551
83	423	INVCAG	-23.7046	35.12	9.45	8.632	TRITURUS	2018-06-05	0.8447
59	435	NOPC	-21.9568	38.64	10.3	9.906	TRITURUS	2018-06-05	1.0096
12	8	HIGH	-24.8265	41.7	9.37	11.57	TRITURUSmet	2018-05-13	0.3713
